# Supplementary material
Source: PubMed Central journal article supplement (PMC2938839)

### ***Chromatin immunoprecipitation (ChIP) in human B cells***

To evaluate Myc binding to human *AURKA* and *AURKB* the human B cell line, P493-6, was cultured with tetracycline (0.1 ug/ml) for 72 hours (+Tet) and released from tetracycline for 8 hours (-Tet). Chromatin from  $1.3 \times 10^7$  cells/ condition was cross-linked, isolated, sonicated and reverse cross linked (Lee, Johnstone et al. 2006). Myc protein was immunoprecipitated from sonicated chromatin using a rabbit polyclonal antibody (Santa Cruz) and magnetic protein G beads (Active Motif, Carlsbad, CA). 1:100 volume of chromatin was processed without antibody and used as total input control for qRT-PCR. qRT-PCR was run on immunoprecipitated and control chromatin using primers designed to detect E-boxes in the human *AURKA* and *AURKB* genes. Primers to detect the known Myc target gene *CCND2* were run as positive controls for the human Myc ChIP (Fernandez, Frank et al. 2003). Percent total chromatin immunoprecipitated was calculated using the equation  $\% \text{ total} = 2^{\text{Ct input} - \text{Ct ChIP}} \times \% \text{ input used for ChIP}$ .

### ***RNA preparation and analyses***

Expression profiling was performed using data previously accumulated (Keller, Nilsson et al. 2005; Nilsson, Keller et al. 2005). Briefly, RNA was prepared using the RNeasy kit (Qiagen, Valencia, CA). cRNA was synthesized using the One-Cycle Target Labeling and Control Reagent package (Affymetrix Inc., Santa Clara, CA) and the reaction was probed to the 430A mouse Affymetrix chip (Affymetrix Inc.). The scanned data output was imported into the Spotfire software (TIBCO Spotfire, Somerville, MA). Following normalization, selected probe sets of the genes indicated in Supplemental Figure S1 were clustered using the Hierarchical Clustering function of Spotfire (TIBCO Spotfire).

### ***Fluorescence in situ hybridization (FISH)***

FISH was performed using dual-colour *AURKA* and *AURKB* probes (Supplemental Table S1) labeled with PlatinumBright550 and PlatinumBright495 (Kreatech Diagnostics, Amsterdam, Netherlands). 8- $\mu\text{m}$  paraffin sections were deparaffinized and pretreated with 0.1% proteinase K (Invitrogen) for 15 – 18 min at 37°C. Samples were aged in 0.1% NP-40/2 $\times$ SSC and DNA was denatured by treatment in 70% formamide/2 $\times$ SSC. After dehydration slides were hybridized with 8 $\mu\text{l}$  of the probes overnight at 37°C and washed. Nuclei were counterstained with 4,6-diamino-2-phenylindole dihydrochloride (DAPI, Sigma-Aldrich, Heidelberg, Germany). FISH analysis was performed using a fluorescence microscope equipped with the tripple bandpass filter set. Signals were scored manually ( $\times 100$  oil immersion objective) in morphologically intact and non-overlapping nuclei. 100 cells were scored for each case (n=5 human Burkitt lymphomas) by two independent operators.

**Table S1. Sequences of primers used for real-time PCR and cloning. List of antibodies used for immunoblotting, immunohistochemistry and ChIP assay. Probes used for FISH analyses.** qRT-PCR data analysis was performed by comparing  $\Delta\Delta C_t$  values with a control sample set as 1 (Livak and Schmittgen 2001).

**Figure S1. Hierarchical clustering of selected mitosis-associated genes and some control genes.** Gene expression analysis was performed using RNA prepared from B220<sup>+</sup> splenic B cells from five weanling-age wild type mice (wt), from five E $\mu$ -Myc transgenic mice (E $\mu$ -Myc), and from thirteen E $\mu$ -Myc lymphomas. Probe set signals were normalized to the mean across mice, and values of each individual case are represented by a colour, with green corresponding to expression below, and red corresponding to expression above the mean.

**Figure S2. Analysis of Myc binding to human *AURKA* and *AURKB* assessed by chromatin immunoprecipitation.** (A) Map of the human *AURKA* and *AURKB* gene regions analyzed for Myc binding. A1.1, A1.2 and A1.3 indicate the PCR amplicons for *AURKA*, B1.3 indicates the PCR amplicon for *AURKB*. (B) P493-6 cells were cultured in the presence of tetracycline (Myc-off) for 72 hours. Tetracycline was then washed off and cells were left untreated (Myc-on; red columns: ChIP-tet) or again cultured with tetracycline (Myc-off; blue columns: ChIP+tet) for 8 hours. Genomic DNA was crosslinked, sheared by sonification and incubated with isotype control antibody or anti-Myc antibody and subsequently analyzed by quantitative real-time PCR for Myc-bound DNA with the primers pairs indicated in (A). The left panel shows the increase in % of total (= [2Ct input – Ct ChIP] x % chromatin used) (Frank, Schroeder et al. 2001), the right panel shows the calculated –fold increase in Myc-bound genomic DNA upon tetracycline withdrawal. Shown is one representative experiment of 2 experiments each performed in duplicate. No significant binding of Myc to the analyzed regions of human *AURKA* and *AURKB* was detected.

**Figure S3. Fluorescence in Situ Hybridization to assess *AURKA* and *AURKB* gene copy number in human BL.** 5 human BL samples were analyzed for *AURKA* and *AURKB* gene amplification by Fluorescence *In Situ* Hybridization (FISH). A representative case is shown. *AURKA* analysis: red colour shows the probe for chromosome 20 and green colour indicates the specific *AURKA* probe. *AURKB* analysis: red colour shows the specific probe for chromosome 17 and green colour indicates the specific *AURKB* probe. FISH analysis did not reveal *AURKA* and *AURKB* gene amplification in n=5 analyzed human Burkitt lymphoma samples.

**Figure S4. Quantification of DNA content upon treatment with the Aurora kinase inhibitor AS703569.** E $\mu$ -Myc lymphomas cultured ex vivo were treated with vehicle only (untreated) or treated with 25nM AS703569 (AKI) for 6h, 24h or 48h. The PI-stained cells were analyzed using the FL2 channel in a linear scale. Apoptosis measurements (Sub-G1) were based on the number of cells which carried less than diploid DNA content (sub-G1) in the FL3 channel in a logarithmic scale. The bars represent the mean  $\pm$  SEM from three independently performed experiments. \* indicates p<0.05, \*\* indicates p<0.01, \*\*\* indicates p<0.001.

**Figure S5. Aurora kinase inhibition by chemical means triggers transient mitotic arrest, polyploidization and apoptosis of E $\mu$ -Myc lymphoma cells.** (A) E $\mu$ -Myc lymphomas cultured ex vivo were treated with 25nM AS703569 for 24h and then collected by cytospin. The Giemsa

and May-Gruenwald staining shows one cell arrested in mitosis and one which has undergone endoreduplication (arrows). A representative image is shown. (B) Ex vivo cultured E $\mu$ -Myc lymphoma cells were assessed for DNA content by flow cytometry analysis of propidium iodide (PI) stained cells. Cells were treated with vehicle only (untreated) or with AS703569 25nM (AKI)  $\pm$  pretreatment with the pan-caspase inhibitor Q-VD-OPH 10 $\mu$ M for the indicated time. The PI-stained cells were analyzed using the FL2 channel in a linear scale. Apoptosis measurements were based on the number of cells which carried less than diploid DNA content (Sub-G1) in the FL3 channel in a logarithmic scale. The upper panel shows representative histograms from one experiment. The lower panel represents the results from three independently performed experiments with bars representing the mean  $\pm$  SEM. \* indicates statistically significant differences ( $p < 0.05$ ).

## REFERENCES

- Fernandez, P. C., S. R. Frank, et al. (2003). "Genomic targets of the human c-Myc protein." Genes Dev **17**(9): 1115-1129.
- Frank, S. R., M. Schroeder, et al. (2001). "Binding of c-Myc to chromatin mediates mitogen-induced acetylation of histone H4 and gene activation." Genes Dev **15**(16): 2069-2082.
- Keller, U., J. A. Nilsson, et al. (2005). "Nfkb 1 is dispensable for Myc-induced lymphomagenesis." Oncogene **24**(41): 6231-6240.
- Lee, T. I., S. E. Johnstone, et al. (2006). "Chromatin immunoprecipitation and microarray-based analysis of protein location." Nat Protoc **1**(2): 729-748.
- Livak, K. J. and T. D. Schmittgen (2001). "Analysis of relative gene expression data using real-time quantitative PCR and the 2(-Delta Delta C(T)) Method." Methods **25**(4): 402-408.
- Nilsson, J. A., U. B. Keller, et al. (2005). "Targeting ornithine decarboxylase in Myc-induced lymphomagenesis prevents tumor formation." Cancer Cell **7**(5): 433-444.

# Table S1

| Primers                          |                                                     |                                              |                                      |
|----------------------------------|-----------------------------------------------------|----------------------------------------------|--------------------------------------|
| Protein                          | Gene                                                | Sense primer                                 | Antisense primer                     |
| <b>Human:</b>                    |                                                     |                                              |                                      |
| c-Myc                            | <i>MYC</i>                                          | 5'-TCAGAGTCTGGATCACCTTCTGCT-3'               | 5'-TGCGTAGTTGTGCTGATGTGTGGA-3'       |
| Aurora kinase A                  | <i>AURKA</i>                                        | 5'-TCCTGAGGAGGAACTGGCATCAAA-3'               | 5'-TACCCAGAGGGCGACCAATTTCAA-3'       |
| Aurora kinase B                  | <i>AURKB</i>                                        | 5'-ATCAGCTGCGCAGAGATCGAAA-3'                 | 5'-CTGCTCGTCAAATGTGCAGCTCTT-3'       |
| Ubiquitin                        | <i>UB</i>                                           | 5'-ACCTGACCAGCAGCGTCTGATATT-3'               | 5'-TCGCAGTTGATTTTCTGGCAAGC-3'        |
| <b>Mouse:</b>                    |                                                     |                                              |                                      |
| c-Myc                            | <i>Myc</i>                                          | 5'-CAAATCCTGTACCTCGTCCGATTTC-3'              | 5'-CTTCTTGCTCTTCTTCAGAGTCGC-3'       |
| Aurora kinase A                  | <i>Aurka</i>                                        | 5'-CACACGTACCAGGAGACTTACAGA-3'               | 5'-AGTCTTGAAATGAGGTCCCTGGCT-3'       |
| Lactate DehydrogenaseA           | <i>Ldha</i>                                         | 5'-AGGTTACACATCCTGGGCCATT-3'                 | 5'-TCAGGAGTCAGTGTACCTTCACA-3'        |
| Aurora kinase B                  | <i>Aurkb</i>                                        | 5'-GCCCTCGCGGGGAACTCTA-3'                    | 5'-GGCATGCACCGACCAGCCAA-3'           |
| Ubiquitin                        | <i>Ub</i>                                           | 5'-TGGCTATTAATTATTCGGTCTGCAT-3'              | 5'GCAAGTGGCTAGAGTGCAGAGTAA-3'        |
| <b>Mouse <i>Aurk</i> genomic</b> |                                                     |                                              |                                      |
| <b>Promoter cloning</b>          |                                                     |                                              |                                      |
| <i>Aurka</i>                     |                                                     | 5'-CAATGCTTGCTGACAGACACCCC-3'                | 5'-CACAGGCAGGAACCTGCTCC-3'           |
| <i>Aurkb</i>                     |                                                     | 5'-ACGCGTAAATGCACACAAGCCCTGTCTCC-3'          | 5'-AGATCTAGCTGGACAGAGAGGGAAACAACA-3' |
| <b>ChIP-mouse</b>                |                                                     |                                              |                                      |
| A1.1                             |                                                     | 5'-ACCGAGGCCCTTTGAGAG-3'                     | 5'-TAAGGAAGCGGGCTAGTGTG-3'           |
| A1.2                             |                                                     | 5'-CCTAGCCAACCACACTAGCC-3'                   | 5'-ACGATTCCGCTCCTCCATTTT-3'          |
| A1.3                             |                                                     | 5'-AAAATGGAGGAGCGAATCGT-3'                   | 5'-GTTCCGAGACGGTGAATGAG-3'           |
| A2.1                             |                                                     | 5'-CTGTGGCATGTGCAACTTTC-3'                   | 5'-GGAGGAGTCCAAGTCTTCA-3'            |
| A2.2                             |                                                     | 5'-GGAGTGTGAGGTAGCTGCAA-3'                   | 5'-CACCAAATGACCTTGATGGTT-3'          |
| A3.2                             |                                                     | 5'-TGCACACTAGAAGAGGGCATT-3'                  | 5'-ATGGCTCAGCGATGAAGAGT-3'           |
| A control                        |                                                     | 5'-CAGACCCGCTAAAGCTCAG-3'                    | 5'-GGCTGGTTTTTCGGACCTAC-3'           |
| B1.1                             |                                                     | 5'-CTCTGGCTGACCAGGAACTC-3'                   | 5'-ATGTGCACGCTCCTTTTTTCT-3'          |
| B1.2                             |                                                     | 5'-GTGCACATCTTGGACACAG-3'                    | 5'-CTTTGGAATCTCCCGCTCA-3'            |
| B1.3                             |                                                     | 5'-GAGCGCCTAGTGCCGTAG-3'                     | 5'-AGAAGGAAGCGAGCTACAC-3'            |
| B2.1                             |                                                     | 5'-GCCATCCTGGAAGTCACTCT-3'                   | 5'-ACGGTCTGCCTGCCTAGC-3'             |
| B2.2                             |                                                     | 5'-TGGCTGCCAGTTGTTTCTTA-3'                   | 5'-TATGCTACAAGGCGCATTTC-3'           |
| B control                        |                                                     | 5'-TACATGATGGATCCTGTGG-3'                    | 5'-ACTGCACGCTTGTGAGTTTG-3'           |
| CAD                              |                                                     | 5'-CACTACGCTTAGGGCTCTGG-3'                   | 5'-GGAGCTGAGACAGGGCAAG-3'            |
| <b>ChIP-human</b>                |                                                     |                                              |                                      |
| A1.1                             |                                                     | 5'-TCCCTCCCTCATTAGCTTCA-3'                   | 5'-AGTGCTGTTGCTCGATAGGC-3'           |
| A1.2                             |                                                     | 5'-GTGTGTTGTGGAGGCCTTTT-3'                   | 5'-ACCTTAACAGGTCCTGAAATGC-3'         |
| A1.3                             |                                                     | 5'-GCTTTGTTCAAATTAAGGTTCTT-3'                | 5'-CCCACAAGACCAACCTC-3'              |
| A control                        |                                                     | 5'-CTGGATGTACTCGGTAGGG-3'                    | 5'-AAGGATTTGCCAGGATCTC-3'            |
| B1.3                             |                                                     | 5'-ACCTGGGAGGTTGGAGGTT-3'                    | 5'-GGACACTAAGAGCTACCCTGATG-3'        |
| B control                        |                                                     | 5'-TCCTAAACTGGAAGCCAAGC-3'                   | 5'-TGGCCAAGGACTTTTCAAAT-3'           |
| CCND2                            |                                                     | 5'-CCTTGACTCAAGGATGCGTTAGA-3'                | 5'-GAGCCGACTGCGGTGAAGT-3'            |
| <b>Antibodies</b>                |                                                     |                                              |                                      |
|                                  | <b>Company</b>                                      | <b>Catalogue number</b>                      |                                      |
| Anti-c-Myc                       | Santa Cruz Biotechnology, Santa Cruz, CA USA        | sc-764                                       |                                      |
| Anti-Aurka                       | Sigma-Aldrich, Saint Louis, MIS USA                 | A5102                                        |                                      |
| Anti-Aurkb                       | Sigma-Aldrich, Saint Louis, MIS USA                 | A1231                                        |                                      |
| Anti-pS10-HH3                    | Upstate, Lake Placid, NY USA                        | #06-570                                      |                                      |
| Anti-Casp3 p17                   | Cell Signaling, Danvers, MA USA                     | #9661                                        |                                      |
| Anti-p27 <sup>Kip1</sup>         | BD Pharmingen, San Jose, CA USA                     | 554002                                       |                                      |
| Anti-ER                          | Santa Cruz Biotechnology, Santa Cruz, CA USA        | sc-542                                       |                                      |
| Anti-B220                        | BD Pharmingen, Heidelberg, Germany                  | 550286                                       |                                      |
| Ki-67                            | DCS Innovative Diagnostik-Systeme, Hamburg, Germany | KI681R06                                     |                                      |
| Anti-Actin                       | Sigma-Aldrich, Saint Louis, MIS USA                 | A2066                                        |                                      |
| <b>Probes</b>                    |                                                     |                                              |                                      |
|                                  | <b>Gene</b>                                         | <b>Company</b>                               | <b>Catalogue number</b>              |
| Aurora kinase A                  | <i>AURKA</i>                                        | Kreatech Diagnostics, Amsterdam, Netherlands | KBI-10721                            |
| Aurora kinase B                  | <i>AURKB</i>                                        | Kreatech Diagnostics, Amsterdam, Netherlands | KBI-10722                            |

# Figure S1

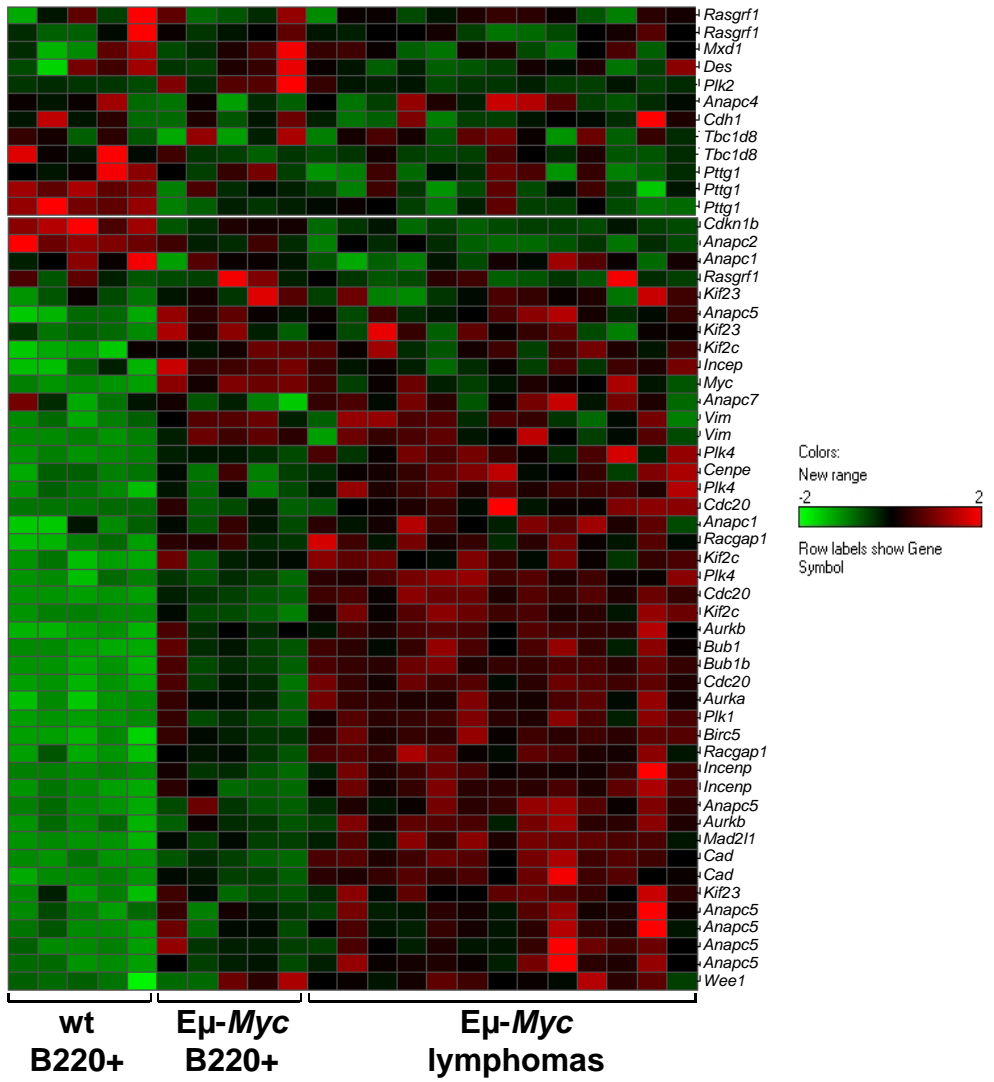

# Figure S2

## A

### Human *AURKA*

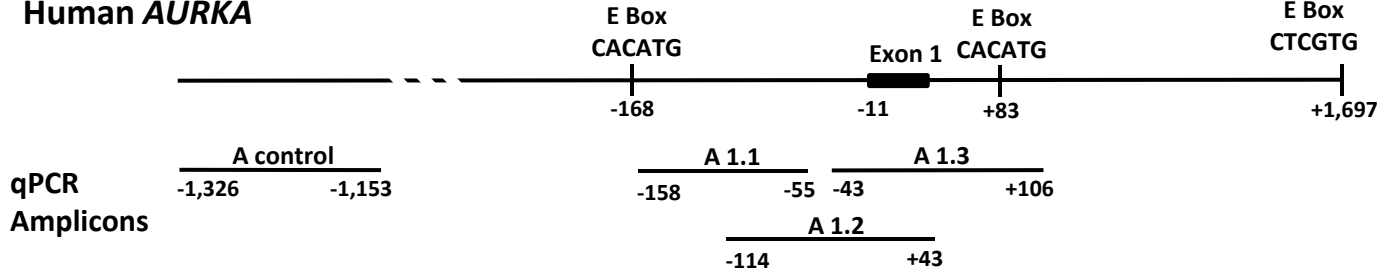

### Human *AURKB*

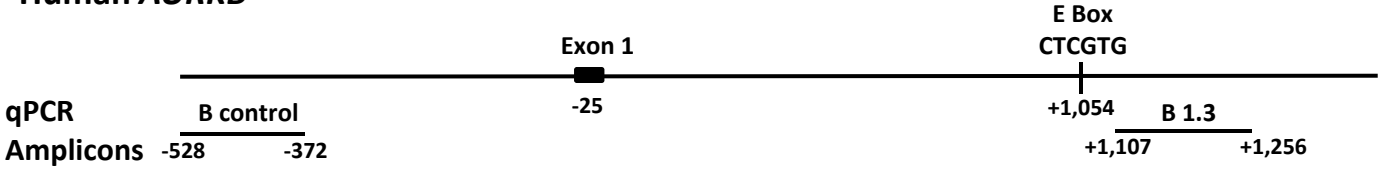

## B

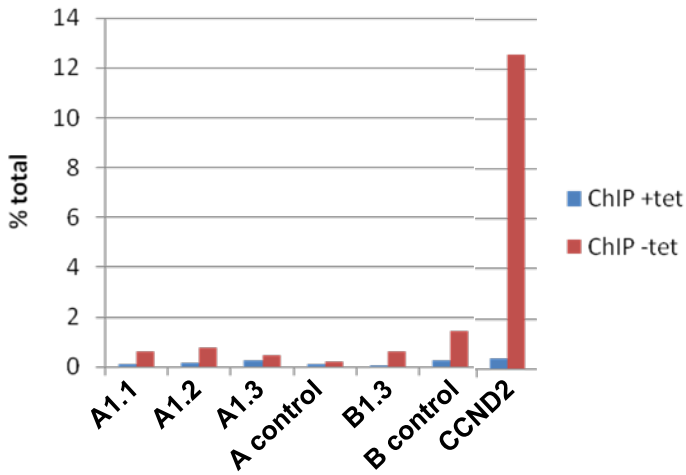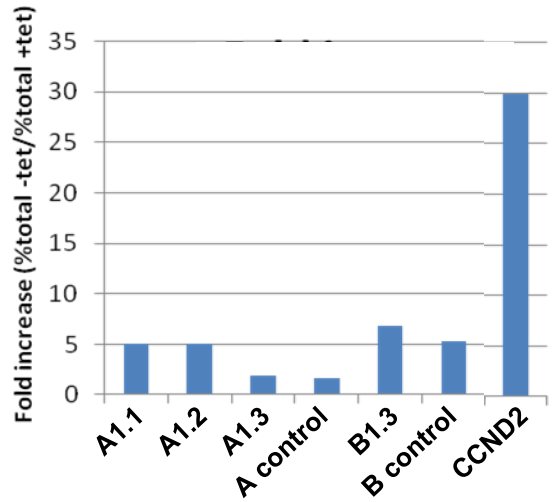

# Figure S3

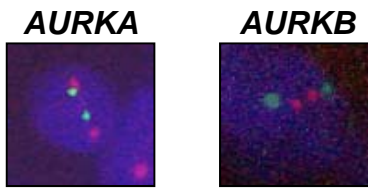



# Figure S4

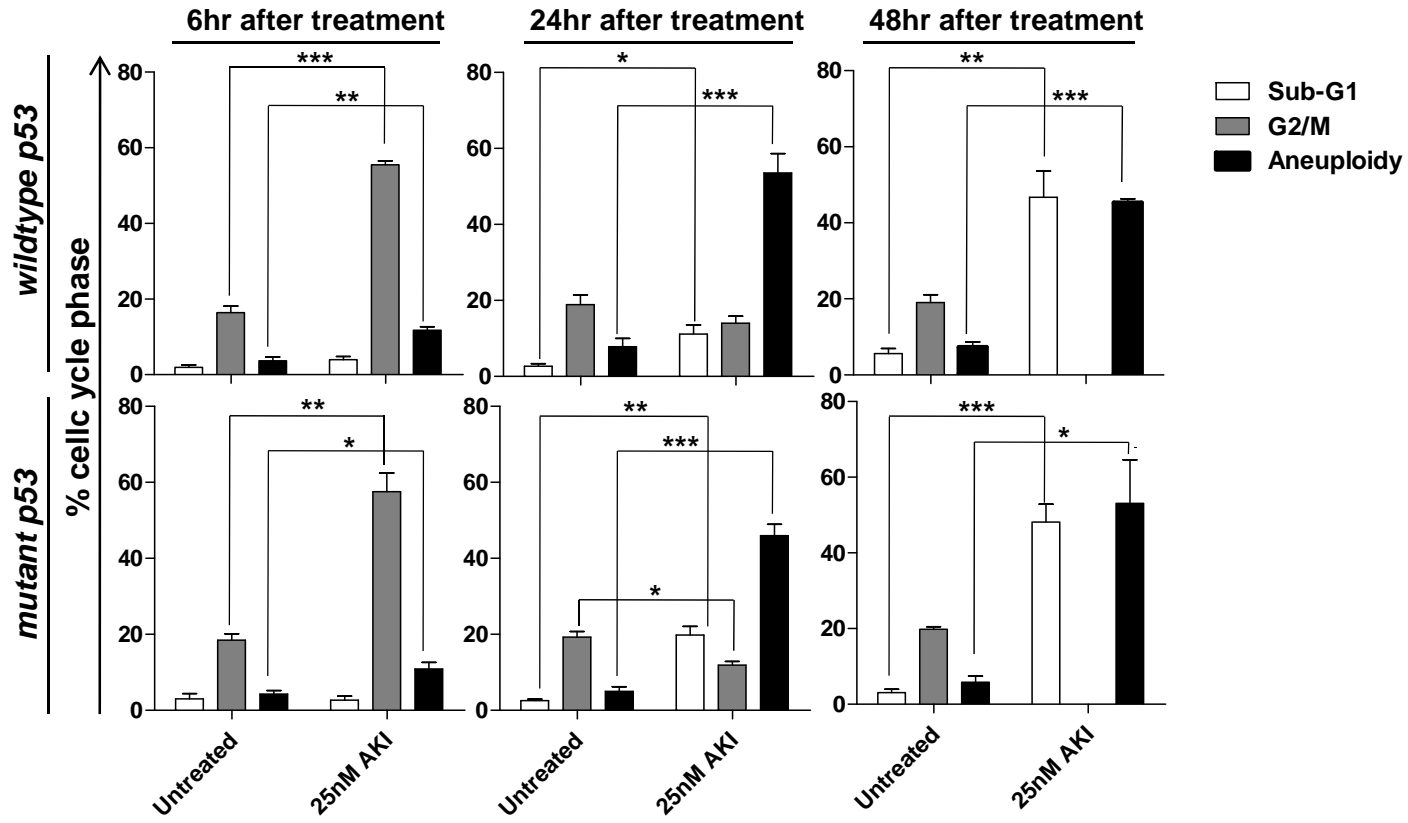

# Figure S5

## A

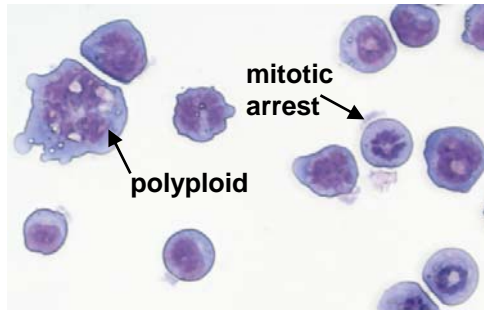

## B

*p53 wildtype lymphoma*

*p53 mutant lymphoma*

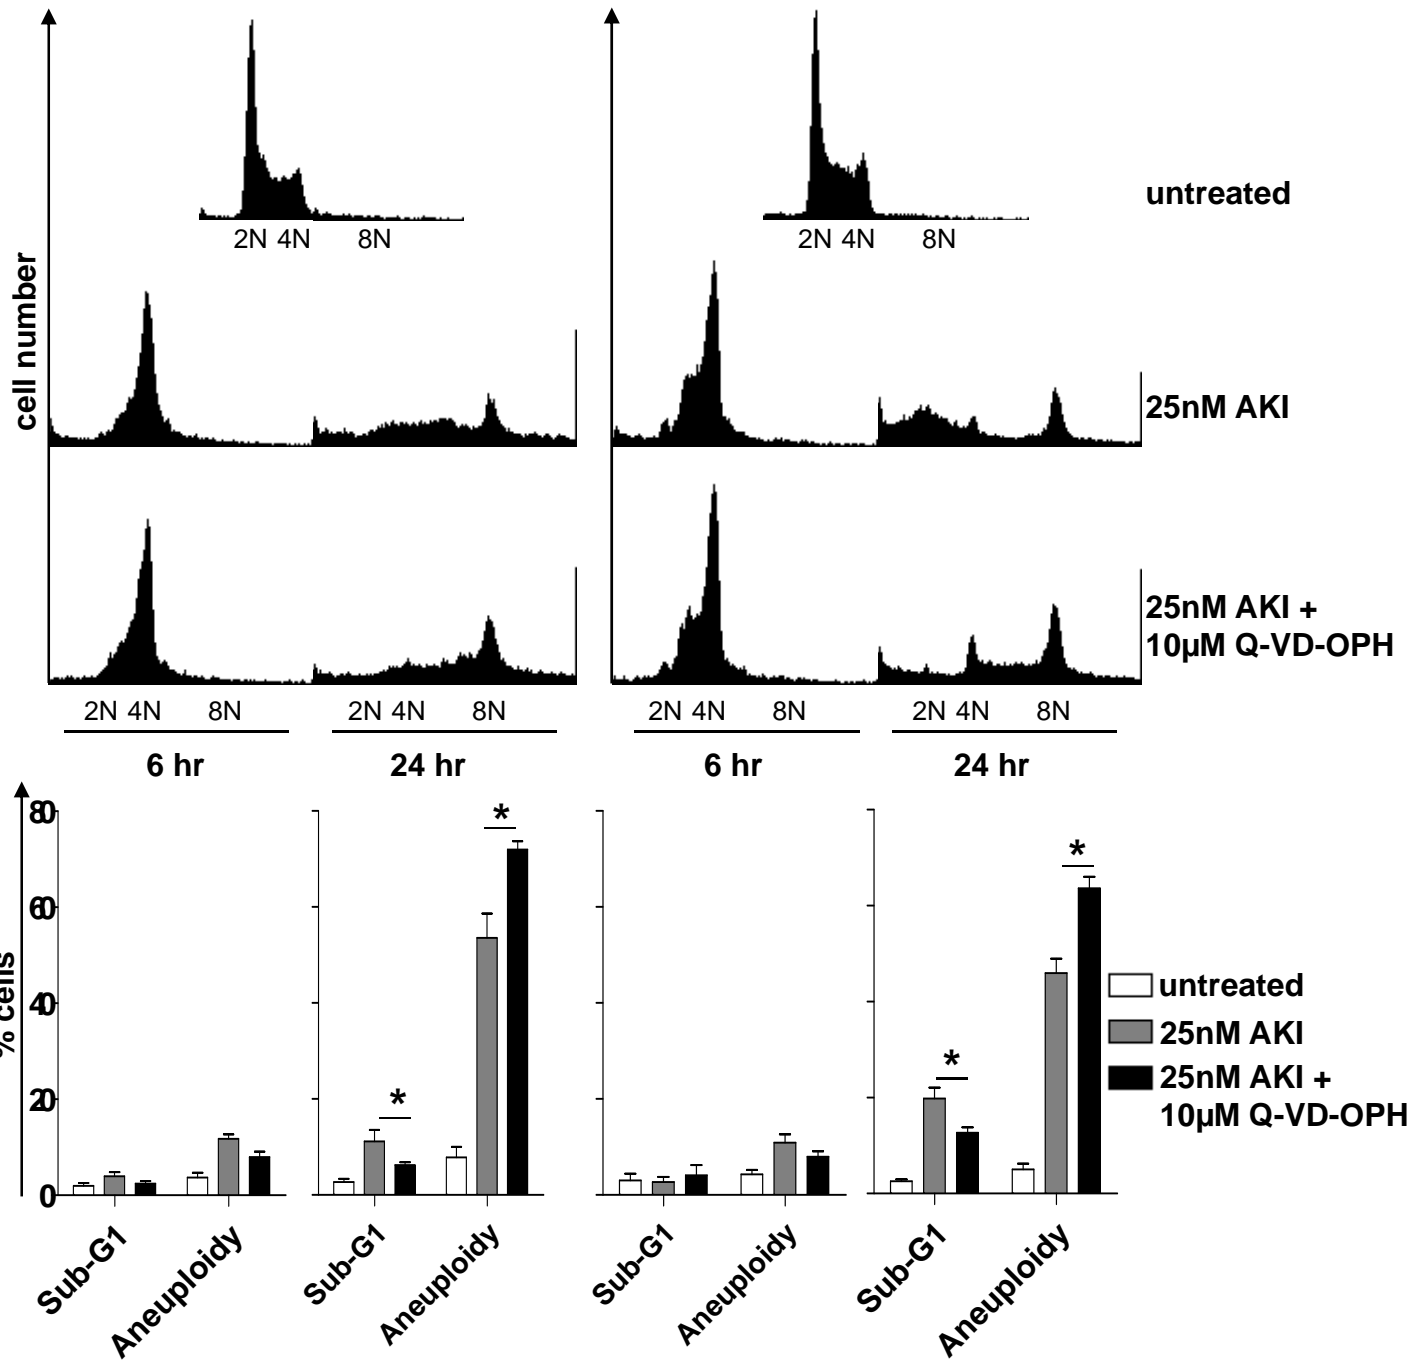

Supplement: blood-2009-11-251074_1.pdf [file blood-2009-11-251074_1.pdf]
